# Expression of concern

## Effect of immobilization on vitamin D status and bone mass in chronically hospitalized disabled stroke patients

YOSHIHIRO SATO, HARUKO KUNO, TAKESHI ASOH, YOSHIAKI HONDA, KOTARO OIZUMI

*Age and Ageing* (1999) **28**: 265–269, doi: 10.1093/ageing/28.3.265

The Editor has been alerted by readers (14<sup>th</sup> August 2018) to concerns about the integrity of the above paper. The issues raised include the following;

- There is a lack of information in the paper about key aspects of governance, with no ethics or funding statement, and no information provided on the laboratory conducting the biochemical measures reported in the study.
- The numbers recruited to the study are implausibly high, given the short recruitment window and the limited capacity of the hospital in which the work was conducted.
- Some of the data values reported in the study are duplicated in other publications by Sato *et al.* This includes a retracted paper in *European Neurology* [1] and *Archives of Physical Medicine and Rehabilitation* [2] and a paper in *Bone* [3].
- Readers should also note that there have been previous expressions of concern and retractions for other research papers from this group [4].

The Editor has contacted the authors of the *Age and Ageing* paper and the institution under whose aegis the research was conducted, regarding the above issues. No responses have been received from any of these parties.

This Expression of Concern should be taken to indicate that the data presented in the article named above may not be reliable.

### References

1. Sato Y, Honda Y, Asoh T *et al.* Hypovitaminosis D and decreased bone mineral density in amyotrophic lateral sclerosis. *Acta Neurol* 1997; **37**: 225–9.
2. Retraction: Sato *et al.* *Am J Phys Med Rehabil* 2005; **34**: 402–8. *American Journal of Physical Medicine & Rehabilitation* 2016; **35**(12):932. doi: 10.1097/phm.0000000000001019
3. Sato Y, Oizumi K, Kuno H *et al.* Effect of immobilization upon renal synthesis of 1,25-dihydroxyvitamin D in disabled elderly stroke patients. *Bone* 1999; **24**: 271–5.
4. Bolland MJ, Avenell A, Gamble GD *et al.* Systematic review and statistical analysis of the integrity of 33 randomized controlled trials. *Neurology* 2016; **87**: 2391–402.

RETRACTED

# Effect of immobilization on vitamin D status and bone mass in chronically hospitalized disabled stroke patients

YOSHIHIRO SATO, HARUKO KUNO, TAKESHI ASOH, YOSHIAKI HONDA, KOTARO OIZUMI<sup>1</sup>

Department of Neurology, Futase Social Insurance Hospital, Iizuka, Japan

<sup>1</sup>First Department of Internal Medicine, Kurume University School of Medicine, Kurume, Japan

Address correspondence to: Y. Sato, Department of Neurology, Kurume University Medical Center, 153-1-1 Kokubunmachi, Kurume 839-0863, Japan. Fax: (+81) 942 22 6533. Email: y-sato@ktam.or.jp

## Abstract

**Objective:** to assess the influence of immobilization upon vitamin D status and bone mass in chronically hospitalized, disabled, elderly patients following stroke.

**Design:** cross-sectional study.

**Setting:** department of geriatric neurology in a Japanese hospital.

**Subjects:** 129 chronically hospitalized, disabled, elderly stroke patients and 28 age-matched controls.

**Results:** we observed a deficiency of both 1,25-dihydroxyvitamin D (1,25-[OH]<sub>2</sub>D; 24.3 pg/ml) and 25-hydroxyvitamin D concentrations (25-OHD; 11.7 ng/ml) in stroke patients compared with controls. A high serum ionized calcium (mean; 2.648 mEq/l) was an independent determinant of the Barthel index (66) and 1,25-[OH]<sub>2</sub>D. When the patients were categorized into three groups by 25-OHD level (deficient, insufficient and sufficient), there was no difference in the mean 1,25-[OH]<sub>2</sub>D levels. Parathyroid hormone levels were normal or low and did not correlate with 25-OHD. Serum bone turnover variables and bone mineral density (BMD) of the second metacarpal in patients were significantly decreased compared to control subjects. Independent determinants of BMD included Barthel index, 25-OHD and 1,25-[OH]<sub>2</sub>D.

**Conclusions:** 1,25-[OH]<sub>2</sub>D deficiency in immobilized stroke patients is not caused by substrate (25-OHD) deficiency but by hypercalcaemia. Immobilization-induced hypercalcaemia may inhibit parathyroid hormone secretion and thus 1,25-[OH]<sub>2</sub>D production, resulting in decreased BMD. Immobilization itself also may be responsible for decreased BMD. Exogenous 1,25-[OH]<sub>2</sub>D (calcitriol) rather than dietary vitamin D supplementation may be required in disabled elderly stroke patients who have a deficiency of 1,25-[OH]<sub>2</sub>D in order to prevent hip fractures, which frequently occur in this population.

**Keywords:** hypercalcaemia, immobilization, stroke, vitamin D

## Introduction

There is a high incidence of hip fracture in stroke patients [1–5], especially elderly women (odds ratio, 2.0) [6]. The relationship between immobility and osteoporosis is well established [7]. We have previously reported that, following hemiplegic stroke, bone loss on the paralysed side is proportionate to the degree of paralysis and to vitamin D deficiency [8, 9].

To assess skeletal status in chronically hospitalized, elderly patients with stroke, we measured bone changes and biochemical indices of bone metabolism and turnover.

## Methods

Stroke patients from the Futase Geriatrics Hospital (a long-term care unit) in Iizuka, Japan, were screened by history and chart review. Exclusion criteria included: age younger than 65 years, total disability, quadriplegia, less than 2 years of hospitalization, diseases or use of medications that might interfere with vitamin D metabolism, primary disease other than stroke or time spent outside the hospital during the past 6 months. Also, patients with stroke were excluded if they had other known causes of osteoporosis, such as hyperparathyroidism or renal osteodystrophy; impairment of

hepatic, renal (serum creatinine > 2.0 mg/dl), cardiac or thyroid function. Of 321 individuals screened, 129 (70 women and 59 men) were eligible to participate in the study. Informed consent was obtained from all patients in the presence of a witness.

According to the Classification of Cerebrovascular Diseases III of the National Institute of Neurological Disorders and Stroke [10], strokes were classified as brain infarction ( $n = 59$ ), brain haemorrhage ( $n = 23$ ), subarachnoid haemorrhage ( $n = 10$ ) and vascular dementia with features of parkinsonism ( $n = 37$ ). Of these, 89 patients had hemiplegia.

As controls, 28 age-matched residents of the local community (14 women and 14 men) with no vertebral fractures were recruited.

### Data collection

We collected data from July 1996 to August 1996 (the summer season in Japan). The Barthel index (BI) [11] and duration of illness were recorded for all patients. Body mass index and hand grip strength on the intact side in hemiplegic patients and on the right side in non-hemiplegic subjects were recorded for patients and controls.

On the day of bone evaluation for patients and controls, a fasting blood sample was obtained in the morning. 25-hydroxyvitamin D (25-OHD), 1,25-dihydroxyvitamin D (1,25-[OH]<sub>2</sub>D), intact parathyroid hormone (PTH), intact bone Gla protein (BGP; an osteoblastic bone formation marker [12]), pyridinoline cross-linked carboxy-terminal telopeptide of type I collagen (ICTP; an osteoclastic bone resorption marker [13]) and ionized calcium concentrations were measured in patients and control subjects as described previously [9].

Plain radiographs of the right hand in non-hemiplegic patients and the intact side in hemiplegic patients were used to determine bone changes based on an aluminium step scale. Bone mineral density (BMD) was calculated at the centre of the second metacarpal using computed X-ray densitometry as described previously [11, 15].

Vitamin D intake was determined in patients by a 7-day food record. Information on sunlight exposure was obtained from the patients' hospital charts.

Data are presented as means  $\pm$  SD. Student's *t*-test was used to assess the significance of differences between stroke patients and controls. Spearman's rank correlation coefficients were calculated to determine the relationship between each variable. Multivariate linear regression analysis was used to estimate the independent effects of predictor variables on BMD, BI or 1,25-[OH]<sub>2</sub>D in stroke patients. One-way ANOVA and Fisher's protected least significant difference were used to assess differences between the three stroke groups categorized by 25-OHD levels. *P* values of < 5% were considered statistically significant.

## Results

### Clinical characteristics of study subjects

Results are presented in Table 1. Group composition did not differ between patients and controls with respect to age or gender. Grip strength and body mass index were lower in patients than in controls. Mean duration of hospitalization was 4.6 years. Mean BI score was 66. Thus, all patients had limited mobility that prevented them from venturing outdoors and consequently they were in a sunlight-deprived state. Ten patients (8%) consumed less vitamin D than the Japanese recommended daily allowance (100 IU). All 70 female patients were postmenopausal.

### Serum indices of bone metabolism and bone mineral density

The mean serum concentrations of 25-OHD, 1,25-[OH]<sub>2</sub>D, calcium, intact PTH, intact BGP and ICTP are presented for all cohorts in Table 2. Patients had low 25-OHD (mean 11.7 nmol/l) and 1,25-[OH]<sub>2</sub>D (mean 24.3 pmol/ml) concentrations, high concentrations of ionized calcium, normal or low PTH concentrations and decreased BGP and ICTP concentrations. BMD in hospitalized patients was significantly decreased compared with control subjects. There was no significant difference in serum creatinine levels between the two groups. No significant differences with respect to gender were seen between the serum concentrations of 25-OHD, 1,25-[OH]<sub>2</sub>D, calcium, PTH, BGP or ICTP.

### Relationships between BMD, BI or vitamin D and each variable

BMD correlated with the BI score ( $r = 0.351$ ,  $P < 0.0001$ ), 25-OHD, 1,25-[OH]<sub>2</sub>D, BGP and ICTP concentrations, but not with calcium and PTH concentrations or hand grip strength ( $P = 0.26$ ; Table 3). The BI score correlated positively with 25-OHD or 1,25-[OH]<sub>2</sub>D and negatively with calcium. In addition, serum ionized calcium correlated negatively with 25-OHD, 1,25-[OH]<sub>2</sub>D and ICTP, and 1,25-[OH]<sub>2</sub>D correlated negatively with calcium and ICTP. Serum creatinine did not correlate with any indices. There was no correlation between 25-OHD and PTH ( $P = 0.0829$ ).

Table 1. Clinical characteristics of study subjects

| Variable                             | Controls<br>( $n = 28$ ) | Patients<br>( $n = 129$ ) | <i>P</i> value |
|--------------------------------------|--------------------------|---------------------------|----------------|
| Age (years)                          | 70.2 $\pm$ 4.1           | 71.2 $\pm$ 4.7            | 0.57           |
| Gender (M/F)                         | 14/14                    | 59/70                     | 0.68           |
| Duration of illness (years)          | -                        | 4.6 $\pm$ 2.9             | -              |
| Barthel index                        | -                        | 66 $\pm$ 31               | -              |
| Grip strength (kg)                   | 23 $\pm$ 6               | 13.8 $\pm$ 4.9            | < 0.0001       |
| Body mass index (kg/m <sup>2</sup> ) | 22.3 $\pm$ 2.0           | 20.7 $\pm$ 3.4            | 0.0066         |

Table 2. Biochemical data and bone mineral density in patients and controls

| Variable                                  | Mean value ± SD              |                               | Student's <i>t</i> -test |
|-------------------------------------------|------------------------------|-------------------------------|--------------------------|
|                                           | Controls<br>( <i>n</i> = 28) | Patients<br>( <i>n</i> = 129) |                          |
| 25-hydroxyvitamin D (ng/ml)               | 25.2 ± 4.0                   | 11.7 ± 5.3                    | <0.0001                  |
| 1,25-dihydroxyvitamin D (pg/ml)           | 57.4 ± 14.0                  | 24.3 ± 12.2                   | <0.0001                  |
| Ionized calcium (mEq/l)                   | 2.529 ± 0.105                | 2.648 ± 0.232                 | 0.0089                   |
| Intact parathyroid hormone (1-84) (pg/ml) | 34.5 ± 12.0                  | 29.4 ± 17.5                   | 0.14                     |
| Bone Gla protein (ng/ml)                  | 6.415 ± 3.529                | 4.527 ± 2.371                 | 0.0015                   |
| ICTP (ng/ml)                              | 9.416 ± 4.626                | 7.076 ± 1.171                 | 0.0077                   |
| Creatinine (mg/dl)                        | 1.024 ± 0.307                | 1.143 ± 0.396                 | 0.13                     |
| Bone mineral density (mmAl)               | 2.574 ± 0.354                | 2.248 ± 0.525                 | 0.001                    |

ICTP, pyridinoline cross-linked carboxy-terminal telopeptide of type I collagen.

**Multiple regression analysis**

The results of multiple regression analysis with BMD, BI and 1,25-[OH]<sub>2</sub>D as dependent variable are shown in Table 4. BI, 25-OHD and 25-[OH]<sub>2</sub>D were significantly related to BMD; 25-[OH]<sub>2</sub>D, ionized calcium, ICTP and BMD to BI; and BI and calcium to 25-[OH]<sub>2</sub>D.

**Correlation of 1,25-[OH]<sub>2</sub>D concentration with serum levels of 25-OHD**

Serum 25-OHD concentration was defined as deficient when less than 10 ng/ml, insufficient at 10–20 ng/ml and sufficient when exceeding 20 ng/ml [9]. A significant difference in the mean 1,25-[OH]<sub>2</sub>D level between the three groups was noted (ANOVA, *P* = 0.39). The serum concentrations of 1,25-[OH]<sub>2</sub>D were 23.1 ± 12.0 pg/ml in patients with deficient levels of 25-OHD (*n* = 55), 24.9 ± 12.4 pg/ml in patients with insufficient levels (*n* = 68) and 29.7 ± 11.7 pg/ml in patients with sufficient levels (*n* = 6).

**Discussion**

Previous studies have evaluated the vitamin D and calcium status of patients in long-term care [16–20]. 25-OHD deficiency with compensatory hyperparathyroidism has been described in this population [17, 19,

20]. These studies showed 25-OHD deficiency caused by sunlight deprivation and low vitamin D intake [17–20] is associated with only a slight decrease in the concentration of 1,25-[OH]<sub>2</sub>D, the most active metabolite form of vitamin D) in these people in nursing homes [19, 20]. The populations studied have had a wide variety of medical diagnoses, including stroke. We examined elderly patients who were hospitalized chronically for the sequelae of stroke to assess the bone status of the population.

The mean serum 25-OHD concentration in our population was similar to that previously reported for elderly people in nursing homes [17–20]. Generally, immobilization-induced hypercalcaemia is associated with conditions in which bone turnover is high, as in children or adolescents with acute neurologic diseases (such as poliomyelitis or spinal cord injury [21–25]). The serum ionized calcium level is chronically low in isolated 25-OHD deficiency, resulting in feedback stimulation of the parathyroid glands, which causes secondary hyperparathyroidism.

In the present study, PTH was normal or low and no correlation between 25-OHD and PTH was found. Thus, compensatory hyperparathyroidism may not occur in spite of 25-OHD deficiency because inhibition of the parathyroid gland by hypercalcaemia may have overshadowed compensatory PTH secretion. We

Table 3. Correlation between variables

| Variable                | BMD                 | Barthel index      | Ionized calcium     | 1,25-[OH] <sub>2</sub> D |
|-------------------------|---------------------|--------------------|---------------------|--------------------------|
| 25-hydroxyvitamin D     | 0.387               | 0.452              | –0.254 <sup>a</sup> | 0.127 <sup>c</sup>       |
| 1,25-dihydroxyvitamin D | 0.203 <sup>b</sup>  | 0.245 <sup>a</sup> | –0.625              | –                        |
| Ionized calcium         | –0.070 <sup>c</sup> | –0.398             | –                   | –0.625                   |
| Parathyroid hormone     | –0.053 <sup>c</sup> | –                  | –0.030 <sup>c</sup> | –0.018 <sup>c</sup>      |
| Bone Gla protein        | 0.182 <sup>b</sup>  | 0.002 <sup>c</sup> | 0.047 <sup>c</sup>  | 0.017 <sup>c</sup>       |
| ICTP                    | –0.203 <sup>b</sup> | 0.001 <sup>c</sup> | 0.219 <sup>b</sup>  | –0.288 <sup>a</sup>      |
| Creatinine              | –0.004 <sup>c</sup> | 0.063 <sup>c</sup> | –0.028 <sup>c</sup> | –0.064 <sup>c</sup>      |

Values represent Spearman's rank correlation coefficients with the probability values symbolized as follows: *P* < 0.0001, <sup>a</sup>*P* < 0.01, <sup>b</sup>*P* < 0.05, <sup>c</sup>*P* > 0.05.

BMD, bone mineral density; ICTP, pyridinoline cross-linked carboxy-terminal telopeptide of type I collagen.

Table 4. Multiple regression analysis of bone mineral density, Barthel index and 1,25-dihydroxyvitamin D with each index selected as independent variable

|                         | Bone mineral density |        | Barthel index |        | 1,25-dihydroxyvitamin D |        |
|-------------------------|----------------------|--------|---------------|--------|-------------------------|--------|
|                         | SC                   | P      | SC            | P      | SC                      | P      |
| Barthel index           | 0.266                | 0.0081 | -             | -      | 0.151                   | 0.0362 |
| Bone mineral density    | -                    | -      | 0.221         | 0.0075 | -0.145                  | 0.12   |
| 25-hydroxyvitamin D     | 0.282                | 0.0018 | -0.092        | 0.24   | -                       | -      |
| 1,25-dihydroxyvitamin D | 0.152                | 0.0323 | 0.213         | 0.0015 | -                       | -      |
| Ionized calcium         | -                    | -      | -0.276        | 0.0009 | -0.190                  | 0.0352 |
| Bone Gla protein        | 0.027                | 0.74   | -             | -      | -                       | -      |
| ICTP                    | -0.148               | 0.09   | -0.281        | 0.0005 | -0.181                  | 0.057  |
| Multiple R              | 0.251                | 0.613  | 0.379         |        |                         |        |
| Adjusted R <sup>2</sup> | 0.501                | 0.375  | 0.144         |        |                         |        |
| F                       | 7.994                | 14.303 | 6.027         |        |                         |        |

SC, standardized coefficient. ICTP, pyridinoline cross-linked carboxy-terminal telopeptide of type I collagen.

found no significant difference in 1,25-[OH]<sub>2</sub>D levels between the three stroke groups categorized by 25-OHD level. Also, there was no correlation between creatinine and 1,25-[OH]<sub>2</sub>D levels in these patients. Multiple regression analysis demonstrated that calcium level and BI were independent determinants of 1,25-[OH]<sub>2</sub>D. These results suggest that 1,25-[OH]<sub>2</sub>D deficiency is not caused by substrate (25-OHD) deficiency but by hypercalcaemia. Hypercalcaemia may inhibit PTH secretion and thus, 1,25-[OH]<sub>2</sub>D production in the kidney. Since calcium was an independent determinant of BI, the hypercalcaemia may be caused by immobilization. The observed 25-OHD deficiency due to sunlight deprivation has been previously reported [9].

In addition, we demonstrated that 25-OHD and 1,25-[OH]<sub>2</sub>D were the independent determinants of decreased BMD in this population. This finding suggests that immobilization may cause hypovitaminosis D. In hemiplegic stroke, dependency in the activities of daily living results in decreased mobility of the contralateral limbs, as evidenced by weakness in the fingers of the contralateral side compared with controls. Weakness also occurred in non-hemiplegic patients as reflected in low activities of daily living scores. Osteopenia was not due to weakness in the hand used for BMD measurement or PTH concentration, since no correlations were observed between BMD and hand grip strength or PTH concentration.

In the older, long-term care stroke patients assessed in this study, bone remodelling may almost reach equilibrium, resulting in a steady rate of bone loss [26]. Indeed, decreases in the serum BGP and ICTP concentrations were observed and biochemical indices of bone turnover did not differ significantly between genders—probably because older patients were used in this study. ICTP was an independent determinant of BI. This indicates that prolonged immobilization results in increased bone resorption.

Although a longitudinal study would have been desirable to assess continuous changes of bone and biochemical parameters which occur during after stroke, this cross-sectional study has demonstrated the influence of immobilization on BMD, vitamin D status and bone turnover variables in chronically hospitalized, disabled stroke patients. Dietary vitamin D supplementation with cholecalciferol can reduce bone loss or prevent nonvertebral fractures in elderly patients. Calcitriol treatment increases serum 25-OHD concentrations and consequently, inhibits PTH secretion [1, 28]. However, exogenous 1,25-[OH]<sub>2</sub>D (calcitriol or its analogue) [15, 29] rather than dietary vitamin D supplementation may be required in dependent elderly stroke patients with deficiencies of 1,25-[OH]<sub>2</sub>D to prevent the hip fractures on the hemiplegic side [1-5]. In addition, calcitonin treatment may lower immobilization-induced hypercalcaemia, which tends to suppress 1,25-[OH]<sub>2</sub>D production [30, 31].

### Key points

- A deficiency of both 1,25-dihydroxyvitamin D (1,25-[OH]<sub>2</sub>D; 24.3 pg/ml) and 25-hydroxyvitamin D (25-OHD; 11.7 ng/ml) and a high serum ionized calcium (mean, 2.648 mEq/l) are present in chronically hospitalized, disabled stroke patients.
- Hypercalcaemia may be caused by immobilization.
- 25-[OH]<sub>2</sub>D deficiency is not caused by substrate (25-OHD) deficiency but by hypercalcaemia. Immobilization-induced hypercalcaemia inhibits PTH secretion and thus, 1,25-[OH]<sub>2</sub>D production.
- Bone mineral density (BMD) of the second metacarpal in patients was significantly decreased compared to control subjects and independent determinants of BMD were the Barthel index, 25-OHD and 1,25-[OH]<sub>2</sub>D.

- Exogenous 1,25-[OH]<sub>2</sub>D (calcitriol) rather than dietary vitamin D supplementation may be required in disabled elderly stroke patients who have a deficiency of 1,25-[OH]<sub>2</sub>D to help prevent hip fractures.

References

1. Peszczynski M. The fractured hip in hemiplegic patients. *Geriatrics* 1957; 12: 687-90.

2. Mulley G, Espley AJ. Hip fracture after hemiplegia. *Postgrad Med J* 1979; 55: 264-5.

3. Poplingher AR, Pillar T. Hip fracture in stroke patients. *Acta Orthop Scand* 1985; 56: 226-7.

4. Hooper G. Internal fixation of fractures of the neck of the femur in hemiplegic patients. *Injury* 1979; 10: 281-4.

5. Chiu KY, Pun WK, Luk KDK, Chow SP. A prospective study on hip fractures in patients with previous cerebrovascular accidents. *Injury* 1992; 23: 297-9.

6. Grisso JA, Kelsey JL, Strom BL *et al*. Risk factors for falls as a cause of hip fracture in women. *N Engl J Med* 1991; 324: 1326-31.

7. Biering-Sørensen F, Bohr HH, Schaadt OP. Longitudinal study of bone mineral content in the lumbar spine, the forearm and the lower extremities after spinal cord injury. *Eur J Clin Invest* 1990; 20: 330-5.

8. Sato Y, Maruoka H, Honda Y, Asoh T, Fujimatsu Y, Oizumi K. Development of osteopenia in the hemiplegic finger in patients with stroke. *Eur Neurol* 1996; 36: 278-83.

9. Sato Y, Fujimatsu Y, Kikuyama M, Kaji M, Oizumi K. Influence of immobilisation on bone mass and bone metabolism in hemiplegic elderly patients with a long-standing stroke. *J Neurol Sci* 1998; 156: 205-10.

10. Special Report From the National Institute of Neurological Disorders and Stroke. Classification of cerebrovascular diseases - III. *Stroke* 1990; 21: 637-76.

11. Mahoney FI, Barthel DW. Functional evaluation of the Barthel index. *Md State Med J* 1965; 14: 61-65.

12. Garnero P, Grimaux M, Seguin P, Delmas PD. Characterization of immunoreactive forms of human osteocalcin generated in vivo and in vitro. *J Bone Miner Res* 1994; 9: 255-64.

13. Eriksen EF, Chappard P, Melsen L, Mosekilde L, Risteli L, Risteli J. Serum markers of type I collagen formation and degradation in metabolic bone diseases: correlation with bone histomorphometry. *J Bone Miner Res* 1993; 8: 27-32.

14. Matsumoto C, Kushida M, Tanazaki K, Imose K, Inoue T. Metacarpal bone mass in normal and osteoporotic Japanese women using computerized densitometry. *Calcif Tissue Int* 1994; 55: 324-9.

15. Sato Y, Maruoka H, Oizumi K. Amelioration of hemiplegia-associated osteopenia over 4 years following stroke by 1 α-hydroxyvitamin D<sub>3</sub> and calcium supplementation. *Stroke* 1997; 28: 736-9.

16. Corless D, Beer M, Boucher BJ, Gupta SP, Cohen RD. Vitamin-D status in long-stay geriatric patients. *Lancet* 1975; 1: 1404-6.

17. Petersen MM, Briggs RS, Ashby MA *et al*. Parathyroid hormone and 25-hydroxyvitamin D concentrations in sick and normal elderly people. *Br Med J* 1983; 287: 521-3.

18. Webb AR, Pilbeam C, Hanafin N, Holick MF. An evaluation of the relative contributions of exposure to sunlight and of diet to the circulating concentrations of 25-hydroxyvitamin D<sub>3</sub> in an elderly nursing home population in Boston. *Am J Clin Nutr* 1990; 51: 75-81.

19. Komar L, Nieves J, Cosman F, Rubin A, Srinivas V, Lindsay R. Calcium homeostasis of an elderly population upon admission to a nursing home. *J Am Geriatr Soc* 1993; 41: 57-64.

20. Gloth FM III, Gundberg CD, Hollis BW, Haddad G, Robin JD. Vitamin D deficiency in hospitalized elderly persons. *JAMA* 1995; 274: 1683-6.

21. Minaire P. Immobilisation osteoporosis: a review. *Clin Rheumatol* 1989; 8: 95-103.

22. Henke JA, Thompson JW, Kaufer H. Immobilisation hypercalcaemic crisis. *Arch Surg* 1975; 101: 321-3.

23. Herman EK, Boner G, Thomas JC, Segar WE. Immobilisation hypercalcaemia. *Am Dis Child* 1972; 124: 723-7.

24. Lawrence GD, Langer RG, Martin LG, Connor TB. Immobilisation hypercalcaemia. *J Bone Joint Surg* 1973; 55: 87-94.

25. Steingard AE, Adams M, Byers CM, Segre GV, Broadus AE. Calcium homeostasis in immobilisation: An example of resorptive hypercalcaemia. *N Engl J Med* 1982; 306: 1136-40.

26. Riggs BW, Melton LJ III. Involutional osteoporosis. *N Engl J Med* 1986; 314: 1676-86.

27. Chapuy MC, Arlot ME, Duboeuf F. Vitamin D<sub>3</sub> and calcium to prevent hip fractures in elderly women. *N Engl J Med* 1992; 327: 1637-42.

28. Dawson-Hughes B, Harris SS, Krall EA, Dallal GE. Effect of calcium and vitamin D supplementation on bone density in men and women 65 years of age or older. *N Engl J Med* 1997; 337: 670-6.

29. Tilyard MW, Spears GFS, Thomson J, Dovey S. Treatment of postmenopausal osteoporosis with calcitriol or calcium. *N Engl J Med* 1992; 326: 357-62.

30. Clouston WM, Lloyd HM. Immobilisation-induced hypercalcaemia and regional osteoporosis. *Clin Orthop Rel Res* 1987; 216: 247-52.

31. Wimalawansa SJ. Long- and short-term side effects and safety of calcitonin in man: a prospective study. *Calcif Tissue Int* 1993; 52: 90.

Received 7 January 1998; accepted in revised form 11 June 1998

Downloaded from https://academic.oup.com/ajph/article-abstract/103/10/1824/2691824 by guest on October 20, 2019

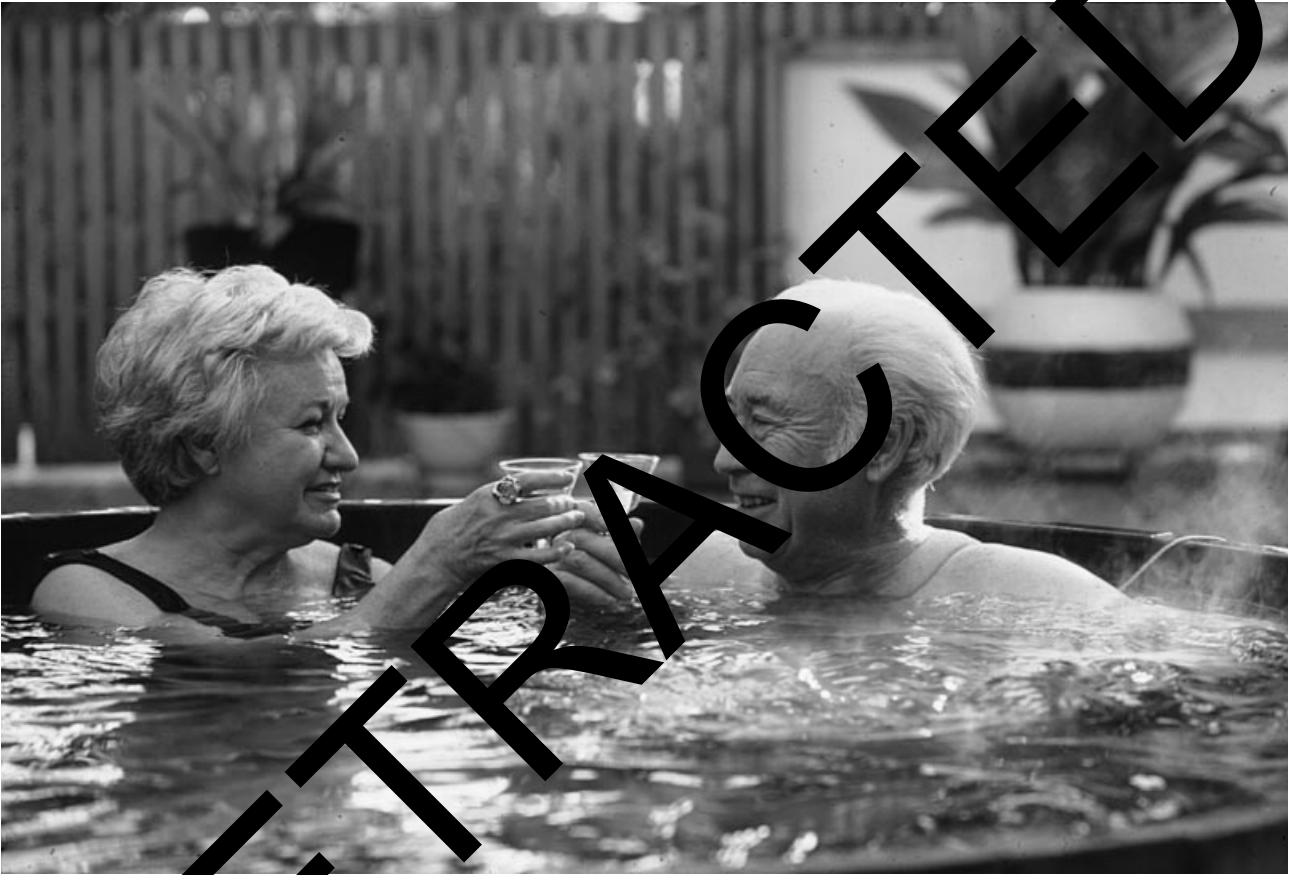

© Magnum/Paul H. Photo.

RETRACTED
